# Supplementary material for: Characterization of Airborne Particles Emitted During Application of Cosmetic Talc Products
Source: MDPI journal article supplement (doi:10.3390/ijerph16203830), 2019-10-11
Supplement: s1 [file s1]

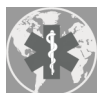

Supplemental Information

# Characterization of airborne particles emitted during application of cosmetic talc products.

Pat E. Rasmussen <sup>1,2\*</sup>, Christine Levesque <sup>1</sup>, Jianjun Niu <sup>1</sup>, Howard D. Gardner <sup>2</sup>, Gregory Nilsson <sup>3</sup> and Kristin Macey <sup>4</sup>

<sup>1</sup> Environmental Health Science and Research Bureau, HECSB, Health Canada, 50 Colombyne Drive, Ottawa, Ontario K1A 0K9, Canada.

<sup>2</sup> Earth and Environmental Sciences Department, University of Ottawa, Ottawa, Ontario K1N 6N5, Canada.

<sup>3</sup> Construction Research Center, National Research Council of Canada, 1200 Montreal Road, Ottawa, Ontario K1A 0R6, Canada.

<sup>4</sup> Existing Substances Risk Assessment Bureau, HECSB, Health Canada, 269 Laurier Ave W., Ottawa, Ottawa, Ontario K1A 0P8, Canada.

\* Correspondence: pat.rasmussen@canada.ca

## SMPS Baby Powder

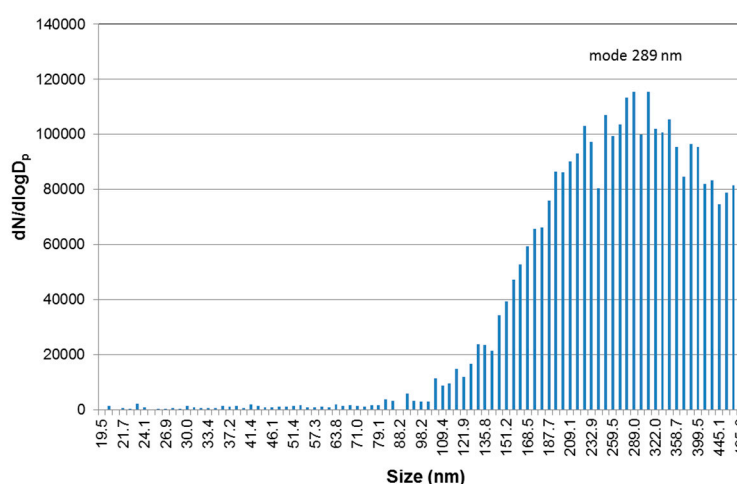

## SMPS Adult Body Powder #1

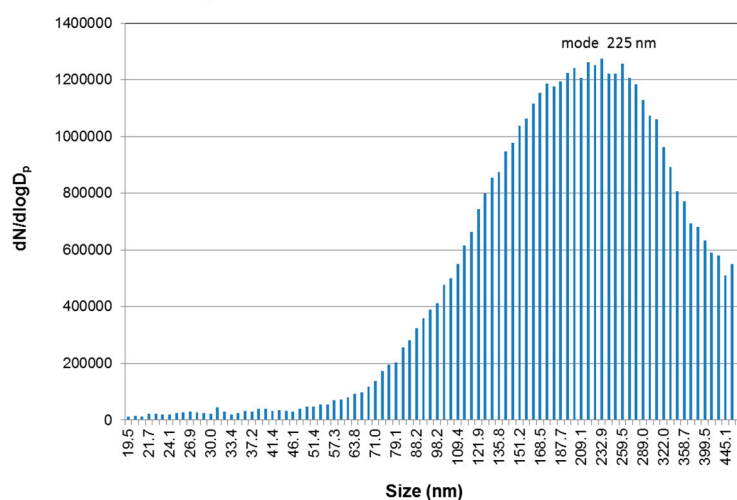

### SMPS Adult Body Powder #2

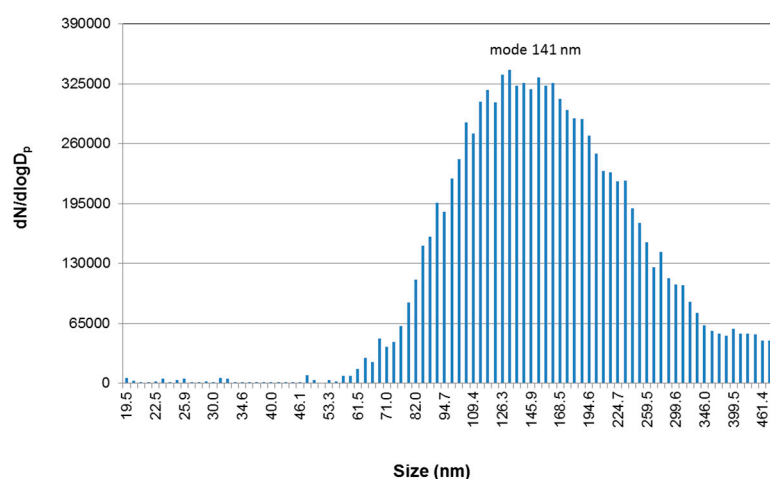

**Figure S1.** Particle size distribution ( $\#/cm^3$ ) of cosmetic talc products described in Table 2 using SMPS ( $<0.5 \mu m$  size range) for the baby powder and two adult body powder products.

### APS Baby Powder

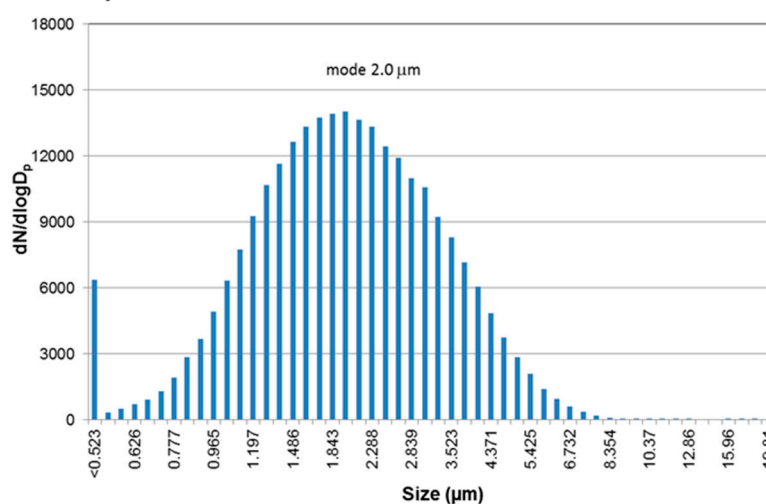

### APS Adult Body Powder #1

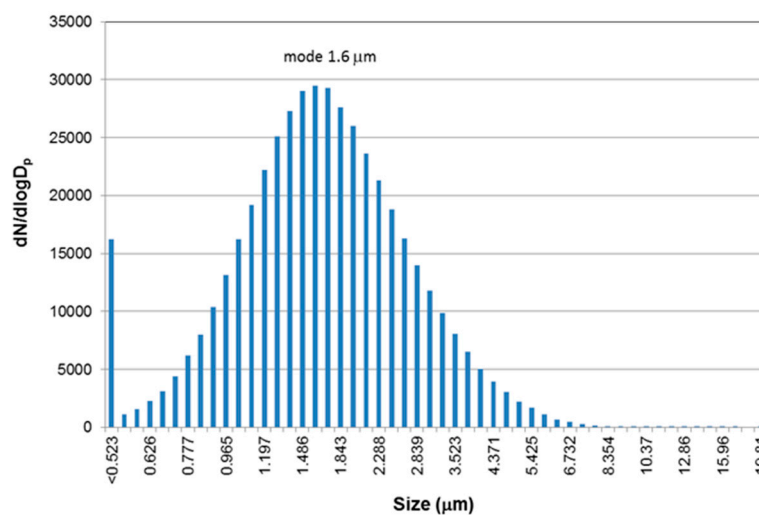

### APS Adult Body Powder #2

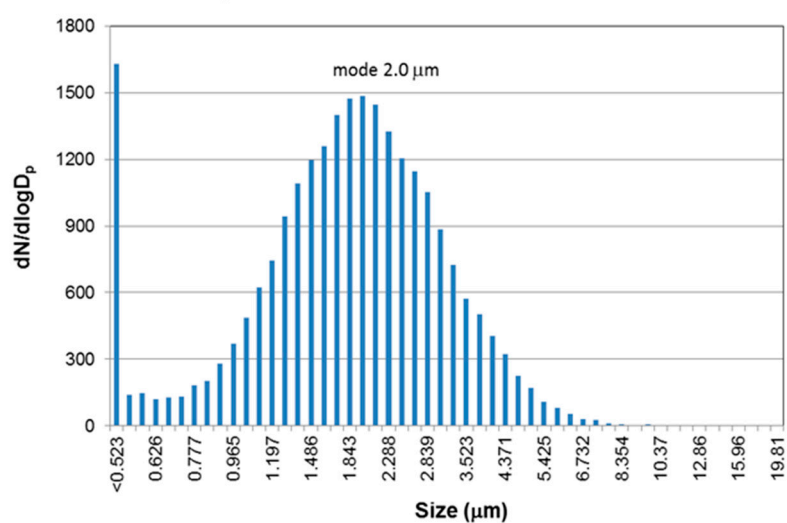

### APS Face Powder

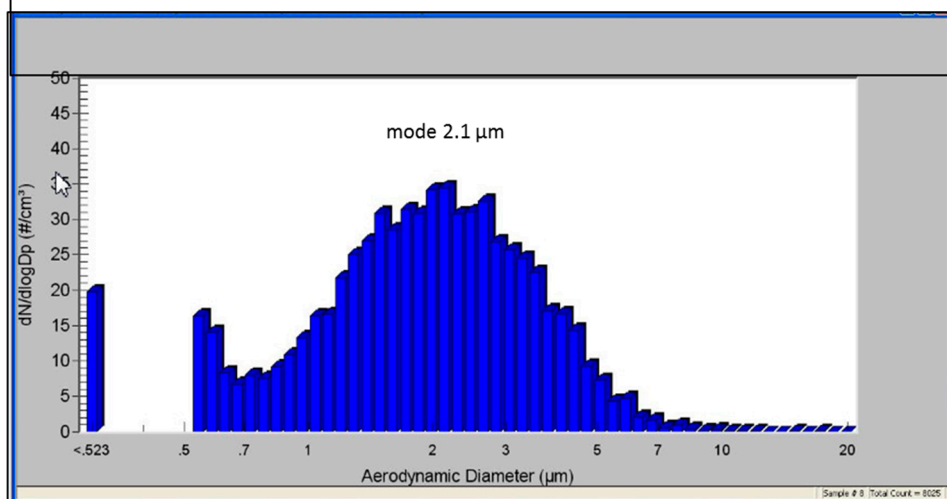

**Figure S2.** Particle size distribution ( $\#/ \text{cm}^3$ ) of cosmetic talc products described in Table 2 using APS ( $\geq 0.5 \mu\text{m}$  size range) for all four products.
